# Supplementary material for: The Combination of 2′-Fucosyllactose with Short-Chain Galacto-Oligosaccharides and Long-Chain Fructo-Oligosaccharides that Enhance Influenza Vaccine Responses Is Associated with Mucosal Immune Regulation in Mice
Source: PubMed Central journal article supplement (PMC6499104; doi:10.1093/jn/nxz006), 2019-04-24
Supplement: nxz006_supplemental_file.pdf [file nxz006_supplemental_file.pdf]

## Supplementary Data

**Supplemental Table 1.** Sequences of specific primers for detected genes with corresponding accession number.

| Gene ID       | Accession number | Forward primer sequence (5'-3') | Reverse primer sequence (5'-3') |
|---------------|------------------|---------------------------------|---------------------------------|
| <i>Il12b</i>  | NM_001303244.1   | GTAACCAGAAAAGGTGCGTTCC          | GAACACATGCCCACTTGCTG            |
| <i>Il1a</i>   | NM_010554.4      | ATGAAGCTCGTCAGGCAGAAG           | GAGATAGTGTTTGTCCACATCCTGAT      |
| <i>Il1b</i>   | NM_008084.2      | ATCCCAAGCAATACCCAAAGAA          | GCTGATGTACCAGTTGGGGAA           |
| <i>Cxcl9</i>  | NM_008599        | TCTGCCATGAAGTCCGCTG             | CAGGAGCATCGTGCATTCCT            |
| <i>Cxcl10</i> | NM_021274.2      | GCCGTCATTTTCTGCCTCAT            | GCTTCCCTATGGCCCTCATT            |
| <i>Cd80</i>   | NM_009855.2      | TGGGAAAAACCCCCAGAAGAC           | GCCCGAAGGTAAGGCTGTT             |
| <i>Cd86</i>   | NM_019388.3      | CAGCACGGACTTGAACAACC            | CTCCACGGAAACAGCATCTGA           |
| <i>Cd40</i>   | NM_011611.2      | ACTAATGTCATCTGTGGTTAAAGT        | GAAACACCCCGAAAATGGT             |
| <i>Cldn1</i>  | NM_016674        | TCTACGAGGGACTGTGGATG            | TCAGATTCAGCTAGGAGTCG            |
| <i>Cldn2</i>  | NM_016675.4      | GGCTGTTAGGCTCATCCAT             | TGGCACCAACATAGGAACTC            |
| <i>Cldn3</i>  | NM_009902        | AAGCCGAATGGACAAAGAA             | CTGGCAAGTAGCTGCAGTG             |
| <i>Zo1</i>    | NM_009386        | CGAGGCATCATCCCAAATAAGAAC        | TCCAGAAGTCTGCCCGATCAC           |
| <i>Tnfa</i>   | NM_013693.3      | AACGGCATGGATCTCAAAGA            | TTTCTCCTGGTATGAGATAGCAAATC      |
| <i>Tgfb</i>   | NM_009368.3      | GCTGTTGAGGAGAGAGTCCA            | TCCATTGGGCTGAAAGGTGT            |
| <i>GAPDH</i>  | NM_008084.2      | GAACATCATCCCTGCATCC             | CACATTGGGGGTAGGAACAC            |

## Supplementary Data

**Supplemental Table 2. Across-group analysis of similarity (ANOSIM) results for mice cecum content and feces microbiota compositions.** Global *R* comparison was based on ANOSIM performed within the software package Primer7. *P*-values were calculated based on a permutational analysis, employing 999 permutations; square-root transformation analysis. CON = control; GF2F=scGOS/lcFOS/2'FL.

| Cecum content (CC)<br>(Genus Taxonomic Level) |                 |                              | Feces (F)<br>(Genus Taxonomic Level) |                 |                              |
|-----------------------------------------------|-----------------|------------------------------|--------------------------------------|-----------------|------------------------------|
| Comparisons                                   | Global <i>R</i> | <i>P</i> -value <sup>a</sup> | Comparisons                          | Global <i>R</i> | <i>P</i> -value <sup>a</sup> |
| CON vs. GF2F                                  | 0.872           | <0.0001                      | CON vs. GF2F                         | 0.600           | <0.0001                      |
| CON vs. 1% 2'FL                               | 0.498           | <0.0001                      | CON vs. 5% 2'FL                      | 0.893           | <0.0001                      |
| CON vs. 0.5% 2'FL                             | 0.240           | <0.01                        | CON vs. 2.5% 2'FL                    | 0.766           | <0.0001                      |
| CON vs. 1% GOS                                | 0.814           | <0.0001                      | CON vs. 1% 2'FL                      | 0.634           | <0.0001                      |
| CON vs. 0.5% GOS                              | 0.775           | <0.0001                      | CON vs. 0.5% 2'FL                    | 0.250           | <0.01                        |
| GF2F vs. 1% 2'FL                              | 0.628           | <0.0001                      | CON vs. 0.25% 2'FL                   | 0.385           | <0.001                       |
| GF2F vs. 0.5% 2'FL                            | 0.965           | <0.0001                      | CON vs. 5% GOS                       | 0.906           | <0.0001                      |
| GF2F vs. 1% GOS                               | 0.360           | <0.0001                      | CON vs. 2.5% GOS                     | 0.435           | <0.001                       |
| GF2F vs. 0.5% GOS                             | 0.534           | <0.0001                      | CON vs. 1% GOS                       | 0.584           | <0.0001                      |
|                                               |                 |                              | CON vs. 0.5% GOS                     | 0.53            | <0.001                       |
|                                               |                 |                              | CON vs. 0.25% GOS                    | 0.182           | ns                           |
|                                               |                 |                              | GF2F vs. 5% 2'FL                     | 0.728           | <0.0001                      |
|                                               |                 |                              | GF2F vs. 2.5% 2'FL                   | 0.308           | <0.01                        |
|                                               |                 |                              | GF2F vs. 1% 2'FL                     | 0.433           | <0.0001                      |
|                                               |                 |                              | GF2F vs. 0.5% 2'FL                   | 0.420           | <0.0001                      |
|                                               |                 |                              | GF2F vs. 0.25% 2'FL                  | 0.461           | <0.0001                      |
|                                               |                 |                              | GF2F vs. 5% GOS                      | 0.866           | <0.0001                      |
|                                               |                 |                              | GF2F vs. 2.5% GOS                    | 0.159           | <0.05                        |
|                                               |                 |                              | GF2F vs. 1% GOS                      | 0.254           | <0.01                        |
|                                               |                 |                              | GF2F vs. 0.5% GOS                    | 0.222           | <0.05                        |
|                                               |                 |                              | GF2F vs. 0.25% GOS                   | 0.534           | <0.0001                      |
